# Supplementary material for: Phosphate determination in environmental, biological and industrial samples using a smartphone as a capture device
Source: Royal Society of Chemistry journal article supplement (doi:10.1039/d1nj05425b), 2021-12-08
Supplement: d1nj05425b1.pdf [file d1nj05425b1.pdf]

**Supplementary material for**

**Phosphate determination in environmental, biological and industrial samples using a  
smartphone as a capture device**

Roberto Sáez-Hernández, Adela R. Mauri-Aucejo, Angel Morales-Rubio, Agustin Pastor, M.L.  
Cervera\*

Department of Analytical Chemistry, University of València, Dr. Moliner 50, 46100 Burjassot,  
València, Spain

E-mail: [roberto.saez@uv.es](mailto:roberto.saez@uv.es), [m.luisa.cervera@uv.es](mailto:m.luisa.cervera@uv.es)

Corresponding author: Dr. M. Luisa Cervera Sanz

Tel.: +34 96 354 34 86

E-mail: [m.luisa.cervera@uv.es](mailto:m.luisa.cervera@uv.es)

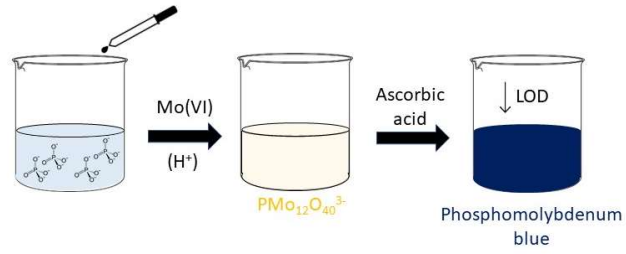

Figure S. 1. Reaction scheme showing to colour evolution during the analytical process. Phosphate is reacted, in acidic media, with Mo(VI) to form a pale yellow complex of P-Mo(VI). Further reaction with ascorbic acid leads to a darker blue colour, due to the formation of a polyoxoanion of P-Mo(VI)-Mo(V). Lower detection limits are obtained thanks to the reduction step.

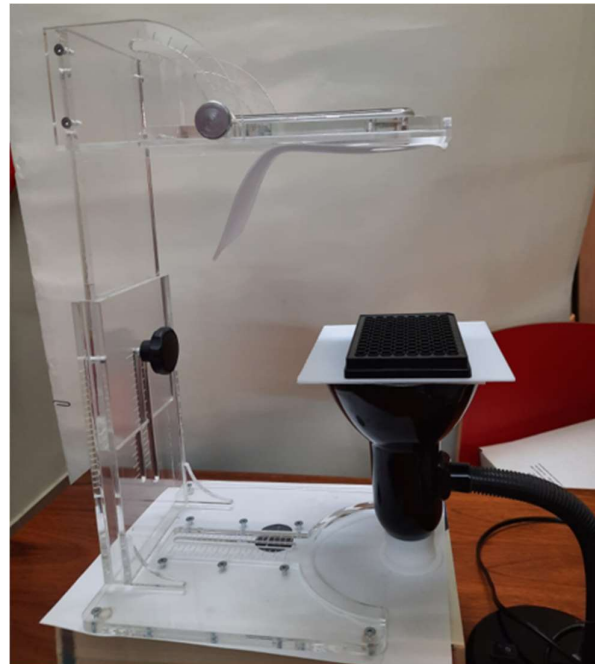

Figure S. 2. The proposed setup consisted of a desktop lamp as a light source, and a methacrylate stand to place the smartphone. A white diffusive material is placed between the LED bulb and the samples.

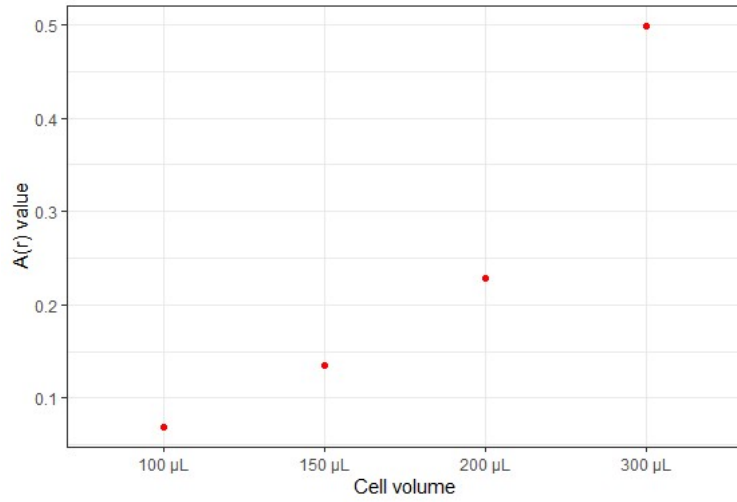

Figure S. 3. A(r) variation with increasing volumes. Data displayed for a 5 mg·L<sup>-1</sup> phosphorus solution.

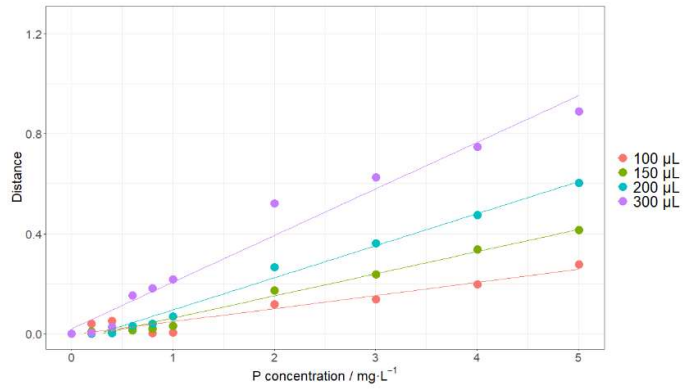

Figure S. 4. Distance value variation over well volume and P concentration.

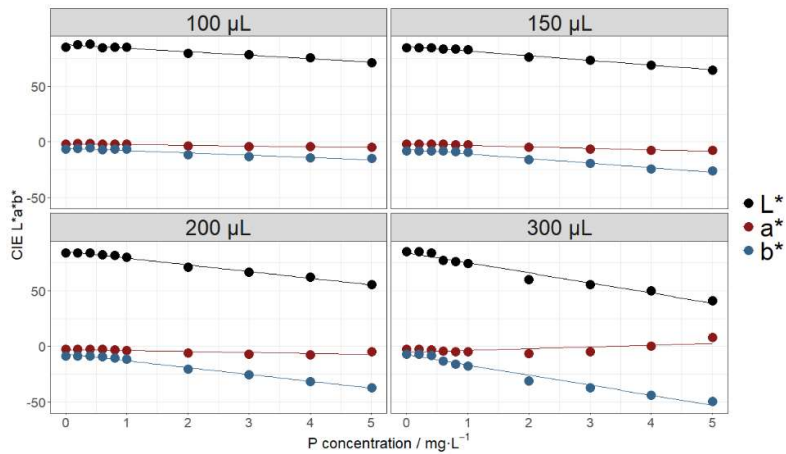

Figure S. 5. CIE L\*a\*b\* colour space result obtained for different well volumes and P concentration.

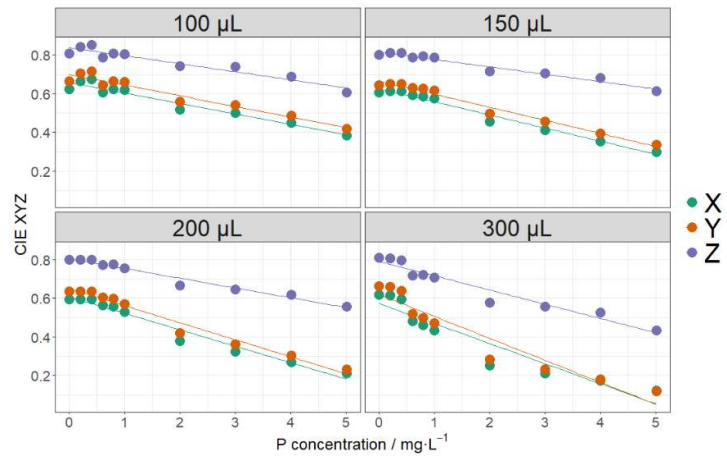

Figure S. 6. CIE XYZ colour space result obtained for different well volumes and P concentration.
